# Supplementary material
Source: Springer Nature journal article supplement (https://www.springermedizin.de/resource/supplementary/13012_2013_747_MOESM1_ESM.pdf/9630566)
Supplement: MOESM1 [file 9630566]

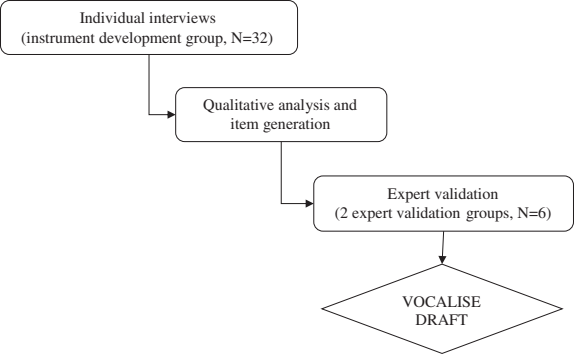

Individual interviews  
(instrument development group, N=32)

Qualitative analysis and  
item generation

Expert validation  
(2 expert validation groups, N=6)

VOCALISE  
DRAFT
